# Supplementary material
Source: publisher figshare collection journal article supplement (https://acs.figshare.com/ndownloader/files/10696936)
Supplement: Supplementary file 1 [file 10696936]

## Supplementary Information

### A ratiometric fluorescent sensor array as a versatile tool for bacterial pathogen identification and analysis

*Denis Svechkarev,<sup>1</sup> Marat R. Sadykov,<sup>2</sup> Kenneth W. Bayles,<sup>2</sup> Aaron M. Mohs<sup>1,3,4,\*</sup>*

<sup>1</sup> Department of Pharmaceutical Sciences, University of Nebraska Medical Center,  
Omaha, NE 68198-6858, United States

<sup>2</sup> Department of Pathology and Microbiology, University of Nebraska Medical Center,  
Omaha, NE 68198-5900, United States

<sup>3</sup> Fred and Pamela Buffett Cancer Center, University of Nebraska Medical Center,  
Omaha, NE 68198-6858, United States

<sup>4</sup> Department of Biochemistry and Molecular Biology, University of Nebraska Medical Center,  
Omaha, NE 68198-6858, United States

## 1. Synthesis of the dyes

To 1 g of a N,N-disubstituted aminobenzaldehyde, 1 equiv. of 2-hydroxyacetophenone (or 2-hydroxynaphthophenone to obtain BfDMAF) was added in a 50 mL round-bottom flask, and the compounds were dissolved in 10 mL of DMF. Subsequently, 3 equiv. of sodium methylate were added, and the mixture was stirred at room temperature for 3 hours. After that, the mixture was transferred into a bigger flask and diluted with 50 mL of ethanol. An excess of 30 equiv. of sodium methoxide was then added, followed by an excess of 20 excess of 20 equiv. of hydrogen peroxide (30% v/v), that was added dropwise while stirring. Formation of the gel of the intermediate epoxide product was observed, which then dissolved upon further addition of H<sub>2</sub>O<sub>2</sub>. The mixture was subsequently refluxed for 2-3 minutes and left to cool down. After that, the reaction mixture was diluted with 50 mL of ultrapure water, and neutralized to pH 6-7. The product was filtered (extracted with ... in case of DOAF) and purified as indicated below.

**DMAF:** the crude product was recrystallized from methanol. Yield 0.71 g (35.5 %). <sup>1</sup>H NMR (500 MHz, DMSO-d<sub>6</sub>): 3.01 (s, 6H), 6.84 (d, 2H), 7.42 (t, 1H), 7.73 (m, 2H), 8.07 (d, 1H), 8.12 (d, 2H), 9.16 (s, 1H).

**BfDMAF:** the crude product was recrystallized from methanol. Yield 0.92 g (41.5 %). <sup>1</sup>H NMR (500 MHz, DMSO-d<sub>6</sub>): 3.02 (s, 6H), 6.87 (d, 2H), 7.66 (t, 1H), 7.77-7.85 (m, 2H), 8.08 (d, 1H), 8.16 (d, 2H), 8.27 (d, 1H), 9.23 (s, 1H), 10.01 (d, 1H).

**DOAF:** the crude product was purified by column chromatography (silica gel, chloroform). Yield 0.31 g (22.2 %). <sup>1</sup>H NMR (500 MHz, DMSO-d<sub>6</sub>): 0.84 (t, 6H), 1.24-1.27 (m, 20H), 1.47 (m, 4H), 3.20 (t, 4H), 6.50 (t, 1H), 6.59 (d, 2H), 6.71 (d, 1H), 7.07 (t, 2H), 7.69 (d, 1H), 8.07 (d, 1H), 9.60 (s, 1H).

**DPAF:** the crude product was recrystallized from methanol. Yield 0.51 g (34.7 %). <sup>1</sup>H NMR (500 MHz, DMSO-d<sub>6</sub>): 7.04 (d, 2H), 7.14 (m, 6H), 7.37 (m, 4H), 7.45 (t, 1H), 7.70 (d, 1H), 7.78 (t, 1H), 8.09 (t, 3H), 9.31 (s, broad, 1H).

**Table S1.** Hydrodynamic radii and polydispersity indices of the dye-lodaded nanoparticles based on data from the dynamic light scattering measurements

| Dye    | Radius, nm | PDI           |
|--------|------------|---------------|
| DMAF   | 440 ± 160  | 0.670 ± 0.120 |
| BfDMAF | 855 ± 50   | 0.465 ± 0.030 |
| DOAF   | 292 ± 7    | 0.065 ± 0.050 |
| DPAF   | 290 ± 16   | 0.385 ± 0.040 |

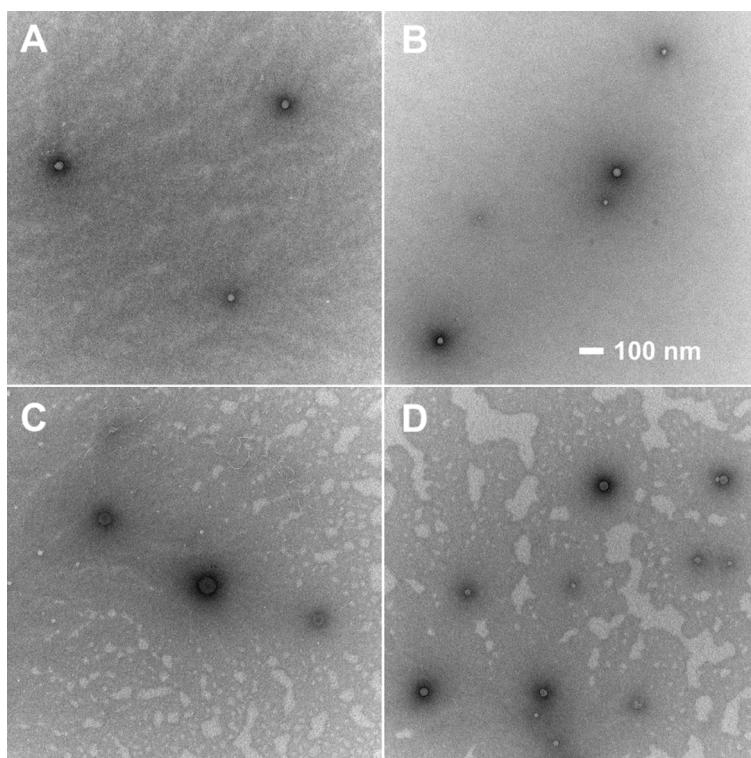

**Figure S1.** TEM micrographs of 0.5 mg/mL solutions of freshly prepared HA nanoparticles loaded with DMAF (A), BfDMAF (B), DOAF (C), and DPAF (D).

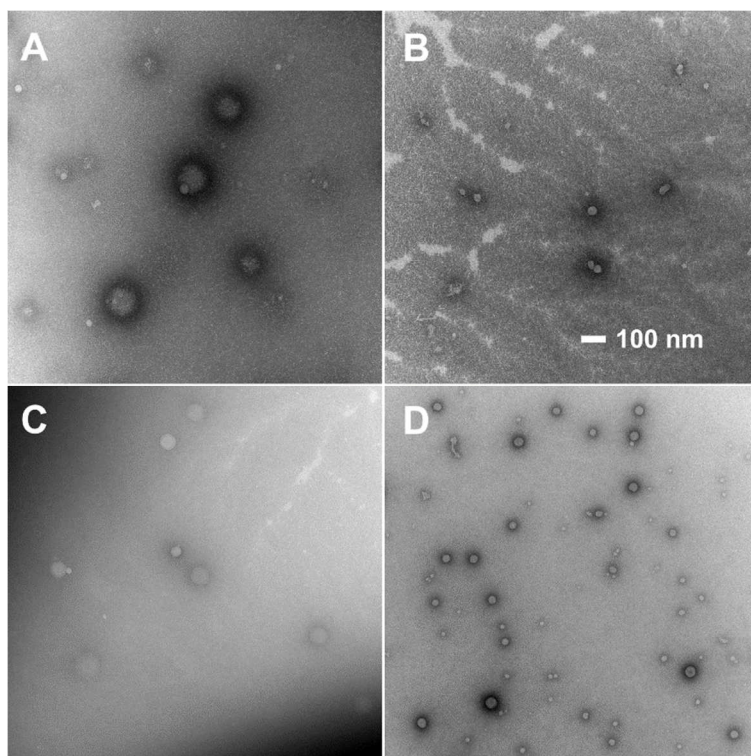

**Figure S2.** TEM micrographs of 0.5 mg/mL solutions of HA nanoparticles loaded with DMAF (A), BfDMAF (B), DOAF (C), and DPAF (D). Solutions were prepared 8 months prior to imaging.

## 2. Fluorescent response upon interaction with bacteria

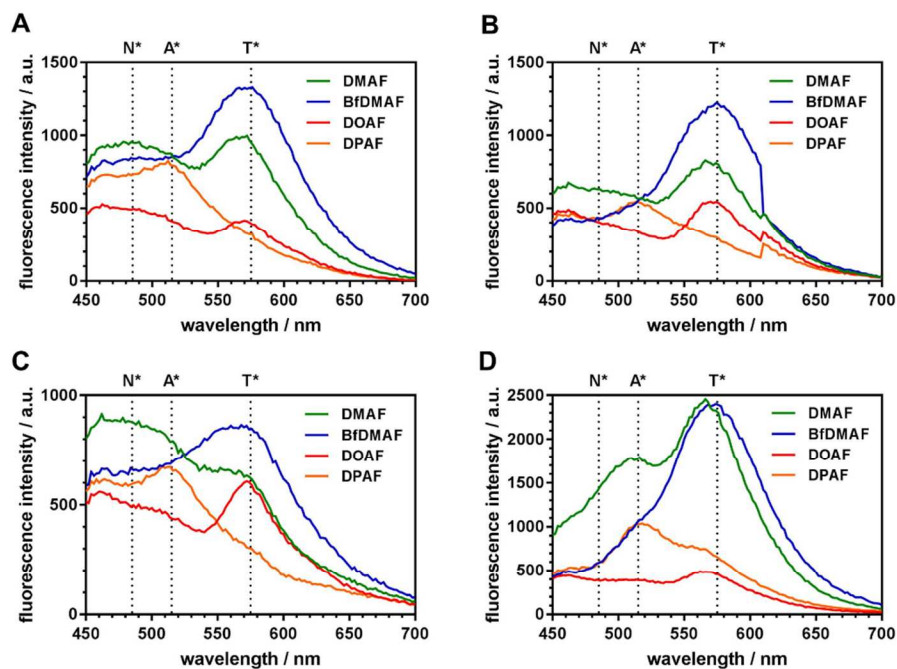

**Figure S3.** Fluorescence spectra of the ratiometric dyes upon interaction with Gram-positive bacteria: *Staphylococcus aureus* (A), *Staphylococcus epidermidis* (B), *Bacillus subtilis* (C), and *Enterococcus faecalis* (D).

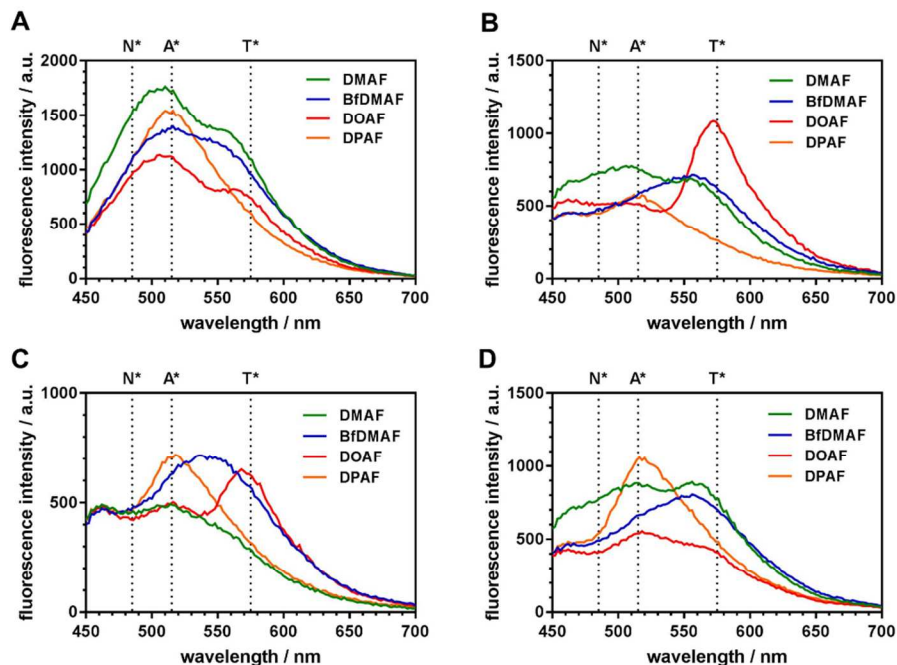

**Figure S4.** Fluorescence spectra of the ratiometric dyes upon interaction with Gram-negative bacteria: *Escherichia coli* (A), *Acinetobacter baumannii* (B), *Klebsiella pneumoniae* (C), and *Citrobacter freundii* (D).

### 3. Multichannel sensing

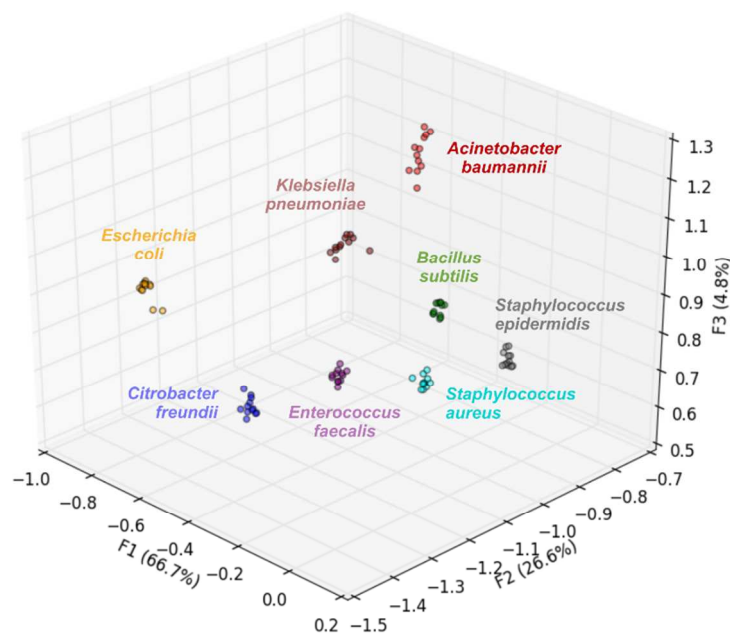

**Figure S5.** Canonical plot of the double-channel ratiometric response from the four sensor components in the subspace of the first three discriminants.

### 4. Analysis of unknown samples

**Table S2.** Results of validation of the sensor array using randomized strain-proportional training (75%) and test (25%) subsets of data

| Unknown species                   | Correct attribution to the corresponding class |     |     |     |     |     |     |     | Total         |
|-----------------------------------|------------------------------------------------|-----|-----|-----|-----|-----|-----|-----|---------------|
|                                   | 1                                              | 2   | 3   | 4   | 5   | 6   | 7   | 8   |               |
| <i>Staphylococcus aureus</i>      | 3/3                                            | 3/3 | 3/3 | 3/3 | 3/3 | 3/3 | 3/3 | 3/3 | 24/24<br>100% |
| <i>Escherichia coli</i>           | 3/3                                            | 3/3 | 3/3 | 3/3 | 3/3 | 3/3 | 3/3 | 3/3 | 24/24<br>100% |
| <i>Staphylococcus epidermidis</i> | 3/3                                            | 3/3 | 3/3 | 3/3 | 3/3 | 3/3 | 3/3 | 3/3 | 24/24<br>100% |
| <i>Acinetobacter baumannii</i>    | 3/3                                            | 3/3 | 3/3 | 3/3 | 3/3 | 3/3 | 3/3 | 3/3 | 24/24<br>100% |
| <i>Klebsiella pneumoniae</i>      | 3/3                                            | 3/3 | 3/3 | 3/3 | 3/3 | 3/3 | 3/3 | 3/3 | 24/24<br>100% |
| <i>Bacillus subtilis</i>          | 3/3                                            | 3/3 | 3/3 | 3/3 | 3/3 | 3/3 | 3/3 | 3/3 | 24/24<br>100% |

(continued on the next page)

|                              |              |              |              |              |              |              |              |              |                         |
|------------------------------|--------------|--------------|--------------|--------------|--------------|--------------|--------------|--------------|-------------------------|
| <i>Citrobacter freundii</i>  | 3/3          | 3/3          | 3/3          | 3/3          | 3/3          | 3/3          | 3/3          | 3/3          | 24/24<br>100%           |
| <i>Enterococcus faecalis</i> | 3/3          | 3/3          | 3/3          | 3/3          | 3/3          | 3/3          | 3/3          | 3/3          | 24/24<br>100%           |
| <b>TOTAL</b>                 | <b>24/24</b> | <b>192/192<br/>100%</b> |

## 5. Predictive potential of the sensor array

**Table S3.** Determination of the Gram status for the unknown samples. Data for pairs of bacterial strains, one Gram(+) and one Gram(-) in each pair (shaded), were excluded from the main dataset and used as the test subset; data for the remaining 6 bacterial species were used as the training subset

| Unknown species                   | Correct determination of the Gram status |            |
|-----------------------------------|------------------------------------------|------------|
|                                   | samples                                  | %          |
| <i>Staphylococcus aureus</i>      | 12/12                                    | 100        |
| <i>Escherichia coli</i>           | 12/12                                    | 100        |
| <i>Staphylococcus epidermidis</i> | 12/12                                    | 100        |
| <i>Acinetobacter baumannii</i>    | 12/12                                    | 100        |
| <i>Klebsiella pneumoniae</i>      | 12/12                                    | 100        |
| <i>Bacillus subtilis</i>          | 12/12                                    | 100        |
| <i>Citrobacter freundii</i>       | 12/12                                    | 100        |
| <i>Enterococcus faecalis</i>      | 12/12                                    | 100        |
| <b>TOTAL</b>                      | <b>96/96</b>                             | <b>100</b> |

**Table S4.** Classification of the unknown samples outside of the training dataset in the “one against the rest” discrimination analysis. Data for the “test species” were excluded from the main dataset and used as a test subset; data for the remaining 7 bacterial species were used as a training subset – the target species against the other 6 species

| Target species               | Test species                      | Correct attribution to the “Other bacteria” class |     |
|------------------------------|-----------------------------------|---------------------------------------------------|-----|
|                              |                                   | samples                                           | %   |
| <i>Staphylococcus aureus</i> | <i>Escherichia coli</i>           | 7/12                                              | 58  |
|                              | <i>Staphylococcus epidermidis</i> | 10/12                                             | 83  |
|                              | <i>Acinetobacter baumannii</i>    | 12/12                                             | 100 |
|                              | <i>Klebsiella pneumoniae</i>      | 12/12                                             | 100 |
|                              | <i>Bacillus subtilis</i>          | 4/12                                              | 33  |
|                              | <i>Citrobacter freundii</i>       | 11/12                                             | 92  |
|                              | <i>Enterococcus faecalis</i>      | 12/12                                             | 100 |

(continued on the next page)

|                                   |                                   |                |           |
|-----------------------------------|-----------------------------------|----------------|-----------|
| <i>Escherichia coli</i>           | <i>Staphylococcus aureus</i>      | 12/12          | 100       |
|                                   | <i>Staphylococcus epidermidis</i> | 12/12          | 100       |
|                                   | <i>Acinetobacter baumannii</i>    | 12/12          | 100       |
|                                   | <i>Klebsiella pneumoniae</i>      | 12/12          | 100       |
|                                   | <i>Bacillus subtilis</i>          | 12/12          | 100       |
|                                   | <i>Citrobacter freundii</i>       | 12/12          | 100       |
|                                   | <i>Enterococcus faecalis</i>      | 2/12           | 16        |
| <i>Staphylococcus epidermidis</i> | <i>Staphylococcus aureus</i>      | 12/12          | 100       |
|                                   | <i>Escherichia coli</i>           | 12/12          | 100       |
|                                   | <i>Acinetobacter baumannii</i>    | 7/12           | 58        |
|                                   | <i>Klebsiella pneumoniae</i>      | 12/12          | 100       |
|                                   | <i>Bacillus subtilis</i>          | 12/12          | 100       |
|                                   | <i>Citrobacter freundii</i>       | 12/12          | 100       |
|                                   | <i>Enterococcus faecalis</i>      | 12/12          | 100       |
| <i>Acinetobacter baumannii</i>    | <i>Staphylococcus aureus</i>      | 12/12          | 100       |
|                                   | <i>Escherichia coli</i>           | 11/12          | 92        |
|                                   | <i>Staphylococcus epidermidis</i> | 3/12           | 25        |
|                                   | <i>Klebsiella pneumoniae</i>      | 10/12          | 83        |
|                                   | <i>Bacillus subtilis</i>          | 12/12          | 100       |
|                                   | <i>Citrobacter freundii</i>       | 12/12          | 100       |
|                                   | <i>Enterococcus faecalis</i>      | 12/12          | 100       |
| <i>Klebsiella pneumoniae</i>      | <i>Staphylococcus aureus</i>      | 12/12          | 100       |
|                                   | <i>Escherichia coli</i>           | 11/12          | 92        |
|                                   | <i>Staphylococcus epidermidis</i> | 12/12          | 100       |
|                                   | <i>Acinetobacter baumannii</i>    | 12/12          | 100       |
|                                   | <i>Bacillus subtilis</i>          | 3/12           | 25        |
|                                   | <i>Citrobacter freundii</i>       | 10/12          | 83        |
|                                   | <i>Enterococcus faecalis</i>      | 12/12          | 100       |
| <i>Bacillus subtilis</i>          | <i>Staphylococcus aureus</i>      | 2/12           | 16        |
|                                   | <i>Escherichia coli</i>           | 12/12          | 100       |
|                                   | <i>Staphylococcus epidermidis</i> | 12/12          | 100       |
|                                   | <i>Acinetobacter baumannii</i>    | 12/12          | 100       |
|                                   | <i>Klebsiella pneumoniae</i>      | 12/12          | 100       |
|                                   | <i>Citrobacter freundii</i>       | 12/12          | 100       |
|                                   | <i>Enterococcus faecalis</i>      | 5/12           | 42        |
| <i>Citrobacter freundii</i>       | <i>Staphylococcus aureus</i>      | 12/12          | 100       |
|                                   | <i>Escherichia coli</i>           | 11/12          | 92        |
|                                   | <i>Staphylococcus epidermidis</i> | 12/12          | 100       |
|                                   | <i>Acinetobacter baumannii</i>    | 12/12          | 100       |
|                                   | <i>Klebsiella pneumoniae</i>      | 12/12          | 100       |
|                                   | <i>Bacillus subtilis</i>          | 12/12          | 100       |
|                                   | <i>Enterococcus faecalis</i>      | 9/12           | 75        |
| <i>Enterococcus faecalis</i>      | <i>Staphylococcus aureus</i>      | 12/12          | 100       |
|                                   | <i>Escherichia coli</i>           | 11/12          | 92        |
|                                   | <i>Staphylococcus epidermidis</i> | 12/12          | 100       |
|                                   | <i>Acinetobacter baumannii</i>    | 12/12          | 100       |
|                                   | <i>Klebsiella pneumoniae</i>      | 12/12          | 100       |
|                                   | <i>Bacillus subtilis</i>          | 12/12          | 100       |
|                                   | <i>Citrobacter freundii</i>       | 12/12          | 100       |
| <b>TOTAL</b>                      |                                   | <b>595/672</b> | <b>89</b> |
